# Supplementary material
Source: ML conference proceedings conference paper supplement (https://proceedings.neurips.cc/paper_files/paper/2019/hash/56352739f59643540a3a6e16985f62c7-Abstract.html)
Supplement: Supplementary file [file 56352739f59643540a3a6e16985f62c7-Supplemental.zip]

---

# Deep Structured Prediction for Facial Landmark Detection (Supplementary Material)

---

Lisha Chen<sup>1</sup>, Hui Su<sup>1,2</sup>, Qiang Ji<sup>1</sup>

<sup>1</sup>Rensselaer Polytechnic Institute, <sup>2</sup>IBM Research

chenl21@rpi.edu, huisu@ibmres.us.ibm.com, jiq@rpi.edu

## A Details of implementation

### A.1 Evaluation

Our results for other methods are obtained using the code and default trained models provided by the authors. Specifically, the references and link to the official code that we use to evaluate are provided in Table 1.

Table 1: References and link to the code for compared algorithms

| Method      | link to the official code                                                                                                                              |
|-------------|--------------------------------------------------------------------------------------------------------------------------------------------------------|
| TCDCN [12]  | <a href="https://github.com/zhzhanp/TCDCN-face-alignment">https://github.com/zhzhanp/TCDCN-face-alignment</a> [11]                                     |
| CFSS [15]   | <a href="https://github.com/zhusz/CVPR15-CFSS">https://github.com/zhusz/CVPR15-CFSS</a> [14]                                                           |
| 3DDFA [16]  | <a href="http://www.cbsr.ia.ac.cn/users/xiangyuzhu/projects/3DDFA/main.htm">http://www.cbsr.ia.ac.cn/users/xiangyuzhu/projects/3DDFA/main.htm</a> [17] |
| CLNF [1]    | <a href="https://github.com/TadasBaltrusaitis/OpenFace">https://github.com/TadasBaltrusaitis/OpenFace</a> [2]                                          |
| CE-CLM [10] | <a href="https://github.com/TadasBaltrusaitis/OpenFace">https://github.com/TadasBaltrusaitis/OpenFace</a> [2]                                          |
| FAN [5]     | <a href="https://github.com/ladrianb/2D-and-3D-face-alignment">https://github.com/ladrianb/2D-and-3D-face-alignment</a> [4]                            |
| SAN [7]     | <a href="https://github.com/D-X-Y/landmark-detection/tree/master/SAN">https://github.com/D-X-Y/landmark-detection/tree/master/SAN</a> [6]              |

### A.2 Implementation details

We use Tensorflow 1.14 as our deep learning framework, and one NVIDIA GeForce RTX 2080 Ti GPU for training. The optimizer we use is Adam. For evaluation on all datasets except for Menpo-profile dataset, we train on 300W-LP and fine-tuned on 300W trainset and the 3D deformable model was trained on 300W-trainset. For evaluation on Menpo-profile dataset, we train on 300W-LP and the 3D deformable model was trained on 300W-LP dataset. Our code will be available at <https://github.com/lisha-chen/Deep-structured-facial-landmark-detection>.

## B Additional Experiment Results

### B.1 Prediction visualization

We show in Fig. 1 the predictions of different methods on some benchmark datasets and their ground truth annotations for a visual comparison. On Fig. 1b, only predictions of visible landmark points on the profile faces as well as the ground truth annotations are drawn for a clearer comparison. We can see from the results that hybrid methods such as CFSS and CE-CLM preserves plausible face shape but their predictions may be wrong for large pose. While purely deep learning based method such as FAN can handle large poses for some samples or points but does not preserve the face shape.

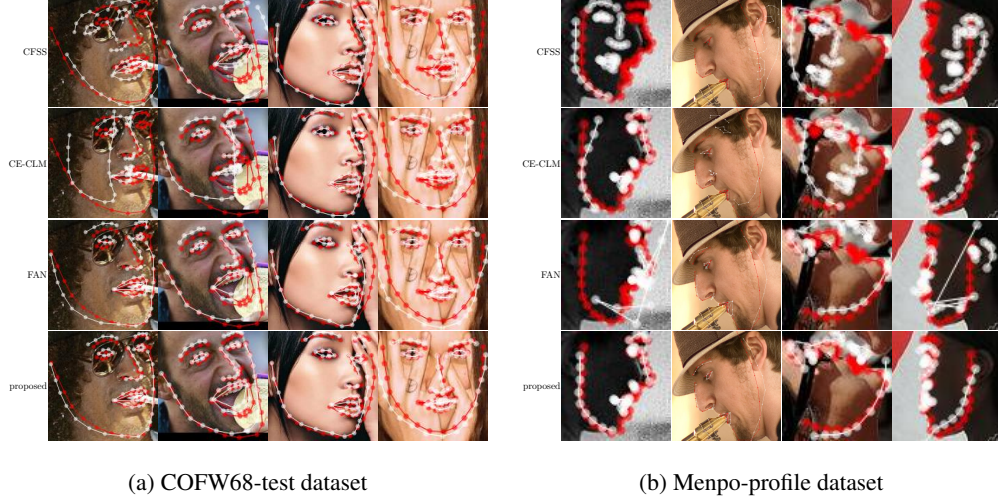

Figure 1: Challenging example images with red dots and lines representing ground truth annotations and white dots and lines representing predictions from different methods.

## C Derivation

### C.1 Mean-field approximation

In this section, we show some derivations to analyze the effect of some approximate learning and inference methods, thus to compare with our exact learning and inference to show the pros and cons. We focus on the part of estimating  $\Theta^{t+1}$  given a known  $\zeta^t$  as shown in Eq. (1)

$$\begin{aligned}
 \Theta^{t+1} &= \arg \min_{\Theta} - \sum_{m=1}^M \ln p_{\Theta}(\mathbf{y}_m, \zeta_m^t | \mathbf{x}_m) = \arg \min_{\Theta} - \sum_{m=1}^M \ln p_{\Theta}(\mathbf{y}_m | \zeta_m^t, \mathbf{x}_m) \\
 &= \arg \min_{\Theta} \sum_{m=1}^M -\frac{1}{2} \ln |\Lambda_p(\mathbf{x}_m, \Theta, \zeta_m^t)| + \frac{1}{2} [\mathbf{y}_m - \mathbf{E}(\mathbf{x}_m, \Theta, \zeta_m^t)]^T \Lambda_p(\mathbf{x}_m, \Theta, \zeta_m^t) [\mathbf{y}_m - \mathbf{E}(\mathbf{x}_m, \Theta, \zeta_m^t)]
 \end{aligned} \tag{1}$$

In Eq. (1), we estimate  $\Theta^{t+1}$  by minimizing the negative log joint probability of facial landmarks  $p_{\Theta}(\mathbf{y}_m | \zeta_m^t, \mathbf{x}_m)$ . However, in some works [9], it is proposed to use mean-field approximation to speed up the learning and inference process especially for large scale problems such as image labeling.

In our work, we can also use mean-field inference. We thus derive the result from the mean-field inference and compare with the result from the exact method.

#### C.1.1 General equation for mean-field inference

To derive the general equation for mean-field inference. Denote the distribution we want to approximate as  $P(y)$ ,  $P(y) = \frac{1}{Z} \tilde{P}(y)$  and the mean-field distribution as  $Q(y)$  where  $y$  is the random variable. By minimizing the KL divergence between  $Q$  and  $P$ , we have Eq. (2) which is also given in [3].

$$Q_i(y_i) = \frac{1}{Z_i} \exp\{E_{Q(y/y_i)}[\ln \tilde{P}(y)]\} \tag{2}$$

Because

$$\begin{aligned}
D_{KL}(Q||P) &= E_Q[\ln \frac{Q}{P}] \\
&= -E_Q[\ln \tilde{P}(y)] + E_Q[\ln Z] + \sum_i E_{Q_i}[\ln Q_i(y_i)] \\
&= -E_Q[\ln \tilde{P}(y)] + \ln Z + \sum_i E_{Q_i}[\ln Q_i(y_i)] \\
&\text{s.t. } \int Q_i(y_i) dy_i = 1
\end{aligned} \tag{3}$$

where the first term

$$\begin{aligned}
-E_Q[\ln \tilde{P}(y)] &= -\int \prod_i Q_i(y_i) [\ln \tilde{P}(y)] dy \\
&= -\int Q_i(y_i) \int \prod_{j \neq i} Q_j(y_j) [\ln \tilde{P}(y)] dy_{j \neq i} dy_i \\
&= -\int Q_i(y_i) E_{Q(y/y_i)}[\ln \tilde{P}(y)] dy_i
\end{aligned} \tag{4}$$

In order to minimize  $D_{KL}(Q||P)$ , we need to take derivative w.r.t. each  $Q_i$  using the Lagrangian method and set it to zero for a constrained optimization problem.

$$\mathcal{L} = D_{KL}(Q||P) + \lambda \sum_i (\int Q_i(y_i) dy_i - 1) \tag{5}$$

Therefore,

$$\frac{\partial \mathcal{L}}{\partial Q_i(y_i)} = -E_{Q(y/y_i)}[\ln \tilde{P}(y)] + \ln Q_i(y_i) + 1 + \lambda = 0 \tag{6}$$

$$Q_i(y_i) = \exp(-\lambda - 1) \exp\{E_{Q(y/y_i)}[\ln \tilde{P}(y)]\} = \frac{1}{Z_i} \exp\{E_{Q(y/y_i)}[\ln \tilde{P}(y)]\} \tag{7}$$

### C.1.2 Mean-field approximation of multivariate Gaussian distribution

In our case, where  $P$  is a multivariate Gaussian distribution, therefore  $Q$  is also a multivariate Gaussian distribution by minimizing the KL divergence. Therefore

$$E_q[y_i] = \arg \max_{y_i} Q_i(y_i) = \arg \max_{y_i} E_{Q(y/y_i)}[\ln \tilde{P}(y)] \tag{8}$$

Thus to compute  $E_q[y_i]$ , we take derivative of  $E_{Q(y/y_i)}[\ln \tilde{P}(y)]$  w.r.t.  $y_i$  and set it to zero. Then we have

$$\frac{\partial E_{Q(y/y_i)}[\ln \tilde{P}(y)]}{\partial y_i} = E_{Q(y/y_i)} \left[ \frac{\partial \ln \tilde{P}(y)}{\partial y_i} \right] = 0 \tag{9}$$

$$E_{Q(y/y_i)} [\Lambda_{pi}(y - E_p[y])] = 0 \text{ for } i = 1, \dots, N. \tag{10}$$

$$E_{Q(y/y_i)} \left[ \sum_j \Lambda_{pij}(y_j - E_p[y_j]) \right] = 0 \text{ for } i = 1, \dots, N. \tag{11}$$

$$\sum_j \Lambda_{pij}(E_q[y_j] - E_p[y_j]) = \Lambda_{pi}(E_q[y] - E_p[y]) = 0 \text{ for } i = 1, \dots, N. \tag{12}$$

From Eq. (12), we can get a linear system of equations to solve for  $E_q[y]$ , that is

$$\Lambda_p(E_q[y] - E_p[y]) = \mathbf{0} \tag{13}$$

The solution to Eq. (13) is  $E_q[y] = E_p[y]$ . Now we compute the precision matrix of the mean-field distribution  $\Lambda_q$ . From Eq. (7) we have

$$Q_i(y_i) = \frac{1}{Z_i} \exp\{E_{Q(y/y_i)}[\ln \tilde{P}(y)]\} = \frac{1}{Z_i} \exp\{E_{Q(y/y_i)}[-\frac{1}{2}(y - E_p[y])^T \Lambda_p(y - E_p[y])]\} \tag{14}$$

Since  $E_q = E_p$ ,  $E_{Q_j(y_j)}[\Lambda_{pij}(y_j - E_p[y_j])] = 0$ ,

$$Q_i(y_i) = \frac{1}{Z_i} \exp\left\{-\frac{1}{2}(y_i - E_p[y_i])^T \Lambda_{pii}(y_i - E_p[y_i])\right\} \quad (15)$$

Therefore  $E_q = E_p$ ,  $Cov_q[y_i] = \Lambda_{pii}^{-1}$ . This conclusion is also given in [3] that the model variable mean is correct but the variance of  $Q$  is determined by the direction of smallest variance of  $P$ .

And the strength of mean-field is that it is a simpler form without computing the inverse or determinant for the whole matrix  $\Lambda_p$ . And during learning, if we use the result of the mean-field to directly optimize the mean-field prediction performance as did in [13], it will affect the gradient for  $C_{ij}$ ,  $\mu_i$ ,  $\Sigma_i$ . During inference, the predicted mean is the same as the exact method but the predicted covariance is different, it will be a diagonal (or band) matrix. This is known as a major failing of mean-field method that it underestimates the uncertainty of model variables and does not capture their covariance (structured uncertainty) [8].

## C.2 Optimize deformable model parameters given landmarks

**To solve**  $\zeta = [\tilde{S}, R, \mathbf{q}]$ , where  $R = \begin{bmatrix} r_1 \\ r_2 \\ r_3 \end{bmatrix}$ ,  $\tilde{S} = \frac{1}{\lambda} \begin{bmatrix} s_1 & 0 & 0 \\ 0 & s_2 & 0 \\ 0 & 0 & 1 \end{bmatrix}$ . We first solve  $R$  and  $\tilde{S}$ , then  $\mathbf{q}$  and iterate this process. Let  $M^{2 \times 3} = \frac{1}{\lambda} \begin{bmatrix} s_1 & 0 \\ 0 & s_2 \end{bmatrix} \begin{bmatrix} r_1 \\ r_2 \end{bmatrix}$ . Rearrange the problem in matrix format

$$\begin{aligned} M &= \arg \min_M \sum_{i=1}^N \sum_{j=i+1}^N [\mathbf{y}_{ij} - M \bar{\mathbf{y}}_{ij}^{3d}]^T C_{ij} [\mathbf{y}_{ij} - M \bar{\mathbf{y}}_{ij}^{3d}] \\ &= \arg \min_M [\mathbf{y}_{IJ} - \text{append}(M \bar{\mathbf{y}}_{IJ}^{3d})]^T \Lambda_{C_{IJ}} [\mathbf{y}_{IJ} - \text{append}(M \bar{\mathbf{y}}_{IJ}^{3d})] \end{aligned} \quad (16)$$

where  $\mathbf{y}_{IJ} = \begin{bmatrix} \mathbf{y}_{12} \\ \mathbf{y}_{13} \\ \vdots \\ \mathbf{y}_{N-1,N} \end{bmatrix}$ ,  $\text{append}(M \bar{\mathbf{y}}_{IJ}^{3d}) = \begin{bmatrix} M \bar{\mathbf{y}}_{12}^{3d} \\ M \bar{\mathbf{y}}_{13}^{3d} \\ \vdots \\ M \bar{\mathbf{y}}_{N-1,N}^{3d} \end{bmatrix}$ .  $\bar{\mathbf{y}}^{3d}$  is known, therefore

$\text{append}(M \bar{\mathbf{y}}_{IJ}^{3d})$  could be written as a linear function of  $M$ , denoted as  $f(M)$ . We rearrange  $M = \begin{bmatrix} m_1 \\ m_2 \end{bmatrix}$  to be a  $6 \times 1$  vector  $M = \begin{bmatrix} m_1^T \\ m_2^T \end{bmatrix}$ . Then  $f(M) = F^{[N(N-1)] \times 6} M^{6 \times 1}$ .

where

$$F = \begin{bmatrix} \bar{\mathbf{y}}_{IJ1}^{3dT} & \mathbf{0} \\ \mathbf{0} & \bar{\mathbf{y}}_{IJ1}^{3dT} \\ \bar{\mathbf{y}}_{IJ2}^{3dT} & \mathbf{0} \\ \mathbf{0} & \bar{\mathbf{y}}_{IJ2}^{3dT} \\ \vdots & \vdots \\ \bar{\mathbf{y}}_{IJ \frac{N(N-1)}{2}}^{3dT} & \mathbf{0} \\ \mathbf{0} & \bar{\mathbf{y}}_{IJ \frac{N(N-1)}{2}}^{3dT} \end{bmatrix}, \Lambda_{C_{IJ}} = \begin{bmatrix} C_{IJ1} & \mathbf{0} & \cdots & \mathbf{0} \\ \mathbf{0} & C_{IJ2} & \vdots & \vdots \\ \vdots & \cdots & \ddots & \mathbf{0} \\ \mathbf{0} & \cdots & \mathbf{0} & C_{IJ \frac{N(N-1)}{2}} \end{bmatrix} \quad (17)$$

Let  $L = [\mathbf{y}_{IJ}^{2d} - \text{append}(M \bar{\mathbf{y}}_{IJ}^{3d})]^T \Lambda_{C_{IJ}} [\mathbf{y}_{IJ}^{2d} - \text{append}(M \bar{\mathbf{y}}_{IJ}^{3d})]$  and take the derivative and set to zero we have

$$\begin{aligned} \frac{\partial L}{\partial M} &= \frac{\partial(\mathbf{y}_{IJ}^{2d} - f(M))}{\partial M} \frac{\partial L}{\partial(\mathbf{y}_{IJ}^{2d} - f(M))} \\ &= F^T \Lambda_{C_{IJ}} (\mathbf{y}_{IJ}^{2d} - FM) = 0 \end{aligned} \quad (18)$$

Therefore  $F^T \Lambda_{C_{IJ}} FM = F^T \Lambda_{C_{IJ}} \mathbf{y}_{IJ}^{2d}$ ,  $M = (F^T \Lambda_{C_{IJ}} F)^{-1} F^T \Lambda_{C_{IJ}} \mathbf{y}_{IJ}^{2d}$ . Given  $M$ ,  $R$  is obtained via SVD.

Note that:  $F^T \Lambda_{C_{IJ}} F$  is invertible when  $\Lambda_{C_{IJ}} \succ 0$ . Because if we take  $\mathbf{v} \in \mathbb{R}^6, \mathbf{v} \neq \mathbf{0}$ , then  $F\mathbf{v} \neq \mathbf{0}$  since if  $F\mathbf{v} = \mathbf{0}, \mathbf{v}^T = [\mathbf{v}_1^T, \mathbf{v}_2^T]$  then there exists a plane with normal  $\mathbf{v}_1$  or  $\mathbf{v}_2$  such that the 3D landmarks  $\bar{\mathbf{y}}_i^{3d}, i = 2, \dots, N$  are on the same plane, which is not true in our case.  $\mathbf{v}^T F^T \Lambda_{C_{IJ}} F \mathbf{v} > 0$ , therefore  $F^T \Lambda_{C_{IJ}} F \succ 0$ .

**To solve  $\mathbf{q}$ :** Given  $R, S, \lambda$ , we can solve  $\mathbf{q}$  linearly as below

$$\begin{aligned} \mathbf{q} &= \arg \min_{\mathbf{q}} \sum_{i=1}^N \sum_{j=i+1}^N [\mathbf{y}_{ij} - \mu_{ij}(\zeta)]^T C_{ij} [\mathbf{y}_{ij} - \mu_{ij}(\zeta)] \\ &= \arg \min_{\mathbf{q}} \sum_{i=1}^N \sum_{j=i+1}^N [\mathbf{y}_{ij} - M(\bar{\mathbf{y}}_{ij}^{3d} + \Phi_{ij}\mathbf{q})]^T C_{ij} [\mathbf{y}_{ij} - M(\bar{\mathbf{y}}_{ij}^{3d} + \Phi_{ij}\mathbf{q})] \\ &= \arg \min_{\mathbf{q}} [\mathbf{y}_{IJ} - \text{append}(M(\bar{\mathbf{y}}_{IJ}^{3d} + \Phi_{IJ}\mathbf{q}))]^T \Lambda_{C_{IJ}} [\mathbf{y}_{IJ} - \text{append}(M(\bar{\mathbf{y}}_{IJ}^{3d} + \Phi_{IJ}\mathbf{q}))] \end{aligned} \quad (19)$$

take the derivative and set to zero we have

$$\begin{aligned} \frac{\partial L}{\partial \mathbf{q}} &= \frac{\partial(\mathbf{y}^{2d} - g(\mathbf{q}))}{\partial \mathbf{q}} \frac{\partial L}{\partial(\mathbf{y}^{2d} - g(\mathbf{q}))} \\ &= G^T \Lambda_{C_{IJ}} (\mathbf{y}_{IJ}^{2d} - g(\mathbf{q})) = 0 \end{aligned} \quad (20)$$

$g(\mathbf{q}) = G\mathbf{q} + T, G = \text{append}(M\Phi_{IJ}), T = \text{append}(M\bar{\mathbf{y}}_{IJ}^{3d})$ . Therefore  $G^T \Lambda_{C_{IJ}} G\mathbf{q} = G^T \Lambda_{C_{IJ}} (\mathbf{y}_{IJ}^{2d} - T)$ ,  $\mathbf{q} = (G^T \Lambda_{C_{IJ}} G)^{-1} G^T \Lambda_{C_{IJ}} (\mathbf{y}_{IJ}^{2d} - T)$ . We conduct the two steps of solving  $M$  and  $\mathbf{q}$  iteratively until convergence.

Note that:  $G^T \Lambda_{C_{IJ}} G$  is invertible when  $\Lambda_{C_{IJ}} \succ 0$ .

## References

- [1] Tadas Baltrušaitis, Peter Robinson, and Louis-Philippe Morency. Continuous conditional neural fields for structured regression. In David Fleet, Tomas Pajdla, Bernt Schiele, and Tinne Tuytelaars, editors, *Computer Vision – ECCV 2014*, pages 593–608, Cham, 2014. Springer International Publishing.
- [2] Tadas Baltrušaitis. Openface 2.1.0: an open source facial behavior analysis toolkit. <https://github.com/TadasBaltrusaitis/OpenFace>, accessed 30-May-2019.
- [3] Christopher M. Bishop. *Pattern Recognition and Machine Learning (Information Science and Statistics)*. Springer-Verlag, Berlin, Heidelberg, 2006.
- [4] Adrian Bulat. How far are we from solving the 2d & 3d face alignment problem? (and a dataset of 230,000 3d facial landmarks). <https://github.com/ladrianb/2D-and-3D-face-alignment>, accessed 30-May-2019.
- [5] Adrian Bulat and Georgios Tzimiropoulos. How far are we from solving the 2d & 3d face alignment problem? (and a dataset of 230,000 3d facial landmarks). In *International Conference on Computer Vision*, 2017.
- [6] Xuanyi Dong. Style aggregated network for facial landmark detection. <https://github.com/D-X-Y/landmark-detection/tree/master/SAN>, accessed 13-June-2019.
- [7] Xuanyi Dong, Yan Yan, Wanli Ouyang, and Yi Yang. Style aggregated network for facial landmark detection. In *Proceedings of the IEEE Conference on Computer Vision and Pattern Recognition (CVPR)*, pages 379–388, 2018.
- [8] Ryan J Giordano, Tamara Broderick, and Michael I Jordan. Linear response methods for accurate covariance estimates from mean field variational bayes. In C. Cortes, N. D. Lawrence, D. D. Lee, M. Sugiyama, and R. Garnett, editors, *Advances in Neural Information Processing Systems 28*, pages 1441–1449. Curran Associates, Inc., 2015.
- [9] Kosta Ristovski, Vladan Radosavljevic, Slobodan Vucetic, and Zoran Obradovic. Continuous conditional random fields for efficient regression in large fully connected graphs. In *AAAI*, 2013.

- [10] Amir Zadeh, Yao Chong Lim, Tadas Baltrusaitis, and Louis-Philippe Morency. Convolutional experts constrained local model for 3d facial landmark detection. In *The IEEE International Conference on Computer Vision (ICCV) Workshops*, Oct 2017.
- [11] Zhanpeng Zhang. Facial landmark detection by deep multi-task learning. <https://github.com/zhzhanp/TCDCN-face-alignment>, accessed 30-May-2019.
- [12] Zhanpeng Zhang, Ping Luo, Chen Change Loy, and Xiaoou Tang. Facial landmark detection by deep multi-task learning. In David Fleet, Tomas Pajdla, Bernt Schiele, and Tinne Tuytelaars, editors, *Computer Vision – ECCV 2014*, pages 94–108, Cham, 2014. Springer International Publishing.
- [13] Shuai Zheng, Sadeep Jayasumana, Bernardino Romera-Paredes, Vibhav Vineet, Zhizhong Su, Dalong Du, Chang Huang, and Philip H. S. Torr. Conditional random fields as recurrent neural networks. In *Proceedings of the 2015 IEEE International Conference on Computer Vision (ICCV)*, ICCV ’15, pages 1529–1537, Washington, DC, USA, 2015. IEEE Computer Society.
- [14] Shizhan Zhu. Face alignment by coarse-to-fine shape searching. <https://github.com/zhusz/CVPR15-CFSS>, accessed 30-May-2019.
- [15] Shizhan Zhu, Cheng Li, Chen Change Loy, and Xiaoou Tang. Face alignment by coarse-to-fine shape searching. In *Proceedings of the IEEE Conference on Computer Vision and Pattern Recognition*, pages 4998–5006, 2015.
- [16] Xiangyu Zhu, Zhen Lei, Stan Z Li, et al. Face alignment in full pose range: A 3d total solution. *IEEE Transactions on Pattern Analysis and Machine Intelligence*, 2017.
- [17] Xiangyu Zhu, Zhen Lei, Xiaoming Liu, Hailin Shi, and Stan Z Li. Face alignment across large poses: A 3d solution. <http://www.cbsr.ia.ac.cn/users/xiangyuzhu/projects/3DDFA/main.htm>, accessed 30-May-2019.
